# Supplementary material
Source: PubMed Central journal article supplement (PMC10039983)
Supplement: NIHMS1834488-supplement-1.pdf [file NIHMS1834488-supplement-1.pdf]

### Supplementary Material

Supplementary Table 1. MNI coordinates for Network ROIs

| Network                | Region                        | MNI coordinates (x, y, z) |
|------------------------|-------------------------------|---------------------------|
| Default Mode Network   | Medial Prefrontal Cortex      | 1, 55, -3                 |
|                        | Angular Gyrus (L)             | -39, -77, 33              |
|                        | Angular Gyrus (R)             | 47, -67, 29               |
|                        | Posterior Cingulate Cortex    | 1, -61, 38                |
| Salience Network       | Anterior Cingulate Cortex     | 0, 22, 35                 |
|                        | Anterior Insula (L)           | -44, 13, 1                |
|                        | Anterior Insula (R)           | 47, 14, 0                 |
|                        | Rostral Prefrontal Cortex (L) | -32, 45, 27               |
|                        | Rostral Prefrontal Cortex (R) | 32, 46, 27                |
| Frontoparietal Network | Lateral Prefrontal Cortex (L) | -43, 33, 28               |
|                        | Lateral Prefrontal Cortex (R) | 41, 38, 30                |
|                        | Posterior Parietal Cortex (L) | -46, -58, 49              |
|                        | Posterior Parietal Cortex (R) | 52, -52, 45               |

Note: (L) = left, (R) = right

Sample distributions of CU traits and externalizing compared to other studies

Mean ICU total score in the present sample ( $22.94 \pm 8.17$ ) were within one standard deviation of other studies with community samples (Byrd et al., 2013; Essau et al., 2006).

Similarly, distribution of empathy scores in the present sample for cognitive ( $12.77 \pm 5.01$ ) and affective ( $17.21 \pm 4.77$ ) empathy were within a standard deviation of the present study IRI scores (e.g., Hawk et al., 2013; Overgaauw et al., 2017).
